# Supplementary material for: EPAC1 inhibition protects the heart from doxorubicin-induced toxicity
Source: eLife journal article supplement (doi:10.7554/elife.83831), 2023-08-08
Supplement: fig1-data1 [file Data_Fig1.xlsx]

## Sheet: Fig1a
FDA- (%)
12h	ct	18.2	17.8	16	24
	dox	20.6	34	17.5	26.3
24h	ct	17.5	18.9	16.6	25.6	22.3	22	31.1	33.8	20	32	11.9	22.2
	dox	46.5	53.2	33.3	56.7	51.5	41	58.2	51.2	52.6	55.4	43.8	62.1
36h	ct	25.8	19.4	17.1	19.3
	dox	85	75.9	71.8	71.6
48h	ct	23.3	18.3	17.8	23.9	14.6
	dox	95.3	69.4	86.8	87.9	79.3

## Sheet: Fig1b
Small (%)
12h	ct	15.1	13.3	12.1	15.8
	dox	14.9	25.3	14	23.8
24h	ct	14.3	12.5	12.2	19.3	24.6	19.5	34.7	27.6	19.8	29.3	11.8	20
	dox	33.5	33.2	32.6	42.4	58.6	44.9	58	45.8	42.4	58.9	34.9	57.3
36h	ct	22.4	17.8	12.9	22
	dox	61.3	66	71.9	67.9
48h	ct	22.5	18	15.7	28.4	12.5
	dox	92.6	68.7	87	88.5	77

## Sheet: Fig1c
TMRM low (%)
12h	ct	41.9	43.5	34.3	27.6
	dox	40	39.7	54.1	32.5
24h	ct	33.5	37.4	40.8	29.4	22.7	17.5	35.3	40.2	50.7	28.2	46	43.5
	dox	85.3	75.8	85	66.4	56.5	54.8	81.4	65.8	72.8	52.9	73.8	75.8
36h	ct	48.9	43.4	46
	dox	95.8	92.1	93
48h	ct	41.1	48.8	55.7	51.1
	dox	99.4	98.4	99	89.2

## Sheet: Fig1d
IP+ (%)
12h	ct	11.7	5.2	1.2	5.1
	dox	6	3.3	1.9	4
24h	ct	6.1	5.5	1.3	9.5	1.1	1.3	1.6
	dox 1µM	8.9	8.8	2.9	14	1	1.8	2.4
36h	ct	5.6	1.7	1.7	6.7
	dox	9.9	1.3	4.4	2.9
48h	ct	6.2	1.5	2.1	6.1
	dox	8	1.7	2.3	1.2

## Sheet: Fig1e
Cycle cellulaire
ctl	8.8	4.9	8.9	9.5
Dox	74.1	36.7	53.6	55.6

## Sheet: Fig1f
Caspase 9 clivé/β-actine (% contrôle)	Quantification Image J
ctl	0.44	0.19	0.63
Dox	1.25	1.1	0.91

## Sheet: Fig1g
Caspase 3 clivé/β-actine (% contrôle)	Quantification Image J
ctl	0.277955	0.251525	0.144862	0.144862	0.322184	0.443456	1.26337	0.481508	0.803547	0.276941	0.361112
Dox	0.829594	1.09193	0.869536	0.869536	0.955118	1.73888	2.38515	1.26805	1.17007	1.21191	1.15875

## Sheet: Fig1h
FDA- (%)
ct	31.1	19.7	19.8	22.2	23.6	17.5	25.6	9.2
dox 1µM	58.2	35.3	43.3	62.1	41.9	46.5	56.7	40.9
ZVAD	27.2	19.8	13.3
ZVAD + dox	27.9	20.2	18.9	23.9	23.7	23.3	26.9	26.6

## Sheet: Fig1i
Small (%)
ct	5.7	34.7	19.5	18.6	20	20.2	14.3	19.3
dox 1µM	36.3	58	39.3	44.1	57.3	40.6	33.5	42.4
ZVAD	14.7	19.9	19.6
ZVAD + dox	19.5	35	22.4	21.6	29.3	27.2	25.7	27.8

## Sheet: Fig1j
pH2AX/b-actin (% of control)
ctl	1.4	0.710506	0.631826	0.36
Dox 6h	1.68395	4.37558	1.31386	1.89492
