# Supplementary material for: EPAC1 inhibition protects the heart from doxorubicin-induced toxicity
Source: eLife journal article supplement (doi:10.7554/elife.83831), 2023-08-08
Supplement: fig2-data1 [file Data_Fig2.xlsx]

## Sheet: Fig2a
EPAC1/b-actin (% of control)
ctl	0.553829	1.03508	1.03297	0.434652	0.714465	0.492271
Dox 3h	0.855972	1.10116	1.31552	0.543655	1.22692	0.620534
Dox 6h	1.13204	1.29682	1.30402	0.658482	1.24464	0.538465
Dox 16h	0.601591	0.583052	1.17974	0.708602	0.43455	0.636845
Dox 24h	0.482916	0.262813		0.427569		0.326456

## Sheet: Fig2b
Pull-Down
0H	3H	6H	16H	24H	8cpt
100	42.66	109.84	115.35	242.44	158.1
100	133.56	201.79	162.22	254.65	114.78
100	185.42	122.58	136.61	172.27	244.01
100	142.305	229.279	207.751	178.155	258.27

## Sheet: Fig2c
BRET
0H	3H	6H	16H	24H
1	1.15474	1.21648	1.12813	1.21224
1	1.10416	1.27824	1.16402	1.20616
1	1.16582	1.14095	1.10219	1.20196
1	1.20939	1.15165	1.21732	1.21558
1	1.14107	1.24656	1.16814	1.12037
1	1.11656	1.20802	1.20385	1.11895
1	1.03975	1.07608	1.12342	1.07801
1	1.08022	1.15613	1.17092	1.09

## Sheet: Fig2d
ctl	1.21703	2.24905	2.2751	2.66073
Dox 3h	3.20627	2.04174	3.45144	3.06196
Dox 6h	3.45144	2.69774	2.48886	4.19759
Dox 16h	1.49968	1.59956	1.58855	3.52371
Dox 24h	3.14775	2.71644	2.98538	3.98107
