# Supplementary material for: EPAC1 inhibition protects the heart from doxorubicin-induced toxicity
Source: eLife journal article supplement (doi:10.7554/elife.83831), 2023-08-08
Supplement: fig3-data1 [file Data_Fig3.xlsx]

## Sheet: Fig3a
pH2AX/b-actin (% of control)
ctl	1.4	0.56	0.36	0.710506	0.631826
Dox 16h	2.02174	1.86059	1.2	1.76458	1.63072
Ce3F4 Dox 16h	0.82	1.15143	0.62	1.12542	0.750574
Ce3F4 16h	0.60303	0.63	0.7

## Sheet: Fig3b
shCT	shCT+DOX1µM	shEpac1	shEpac1+DOX1µM
0.690065	2.32082	0.101116	0.149135
0.202396	2.78644	0.124291	0.862564
0.071421	1.91494	0.35997	2.31791
0.67979		0.040663	0.208172
0.24691		0.122496	0.82097

## Sheet: Fig3c
CT	1.09397	0.672713	2.35352
DOX1µM	14.8328	3.27742	26.5419
8CPT	1.05954	3.78023	4.0028
8CPT + DOX 1µM	30.6681	23.5888	33.5749
ESI09	4.57218	3.33145	2.9848
ESI09 + DOX 1µM	3.45337	5.89518	2.5422
ESI05	2.7954	1.62387	4.57284
ESI05 + DOX 1µM	32.8687	26.6496	11.4416

## Sheet: Fig3d
CT	1	1	1	1	1
Dox 1µM	0.0749031	0.0790231	0.0119741	0.116085	0.0229825
8-CPT 1µM	0.301382	1.13697	1.23016
8-CPT+ Dox 1µM	0.307014	0.124052	0.0494777
ESI09 1µM	0.976363	0.823565	0.311882	1.41105	2.16162
ESI09+ Dox 1µM	0.226521	0.402506	0.40238	0.366758	0.361375
ESI05 1µM	0.721407	0.730244	0.410463	0.785437	1.41456
ESI05+ Dox 1µM	0.0562841	0.0629838	0.199754	0.0532478	0.0363876
