# Supplementary material for: EPAC1 inhibition protects the heart from doxorubicin-induced toxicity
Source: eLife journal article supplement (doi:10.7554/elife.83831), 2023-08-08
Supplement: fig4-data1 [file Data_Fig4.xlsx]

## Sheet: Fig4a
TMRM low (%)
ct	33.5	29.4	37.4	43.6	22.7	17.5	48.3	40.2	28.2	43.5
dox 1µM	85.3	66.4	75.8	58.8	65.8	72.8	74.3	77.6	69	75.8
Ce3F4	38.7	38.6	44.9	48.6	22.4	26	48.5	54.9	60	47.1
Ce3F4 + dox	42.7	63.1	51.7	47	48	55.6	52	56.3	59.5	60.8

## Sheet: Fig4b
Calcein
Ctl	27.8	39	31.8	47.4
Dox	64.9	73.7	68	61.8
Ce3F4		32.5	30.2	46.5
Ce3F4 + Dox	42.4	52.1	48.6	47.3

## Sheet: Fig4c
Complexe I
ctl	261.437	220.941	247.147	225.17
Ce3F4 16h	219.768	223.421	238.876	200.053
Dox 16h	182.15	157.98	181.85	204.84
Ce3F4 Dox 16h	225.61	203.66	230.663	216.128

## Sheet: Fig4d
Complexe IV
ctl	671.893	593.476	842.234
Ce3F4 16h	659.824	728.841	598.744
Dox 16h	430.065	400.013	563.043
Ce3F4 Dox 16h	590.498	634.637	647.647

## Sheet: Fig4e
Caspase 9 clivé/β-actine (% contrôle)	Quantification Image J
Ctl	0.44	0.19	0.63
Ce3F4	0.54	0.6	0.78
Dox	1.25	1.1	0.91
Ce3F4 dox	0.57	0.53	0.72

## Sheet: Fig4f
Caspase 3 clivé/β-actine (% contrôle)	Quantification Image J
ctl	0.277955	0.251525	0.144862	0.144862	0.322184	1.26337	0.481508	0.803547	0.276941	0.361112	0.443456
Ce3F4	0.300268	0.366218	0.256708	0.256708	0.376843	1.16147	0.394205
Dox	0.829594	1.09193	0.869536	0.869536	0.955118	2.38515	1.26805	1.17007	1.21191	1.15875	1.73888
Ce3F4 dox	0.634121	0.870442	0.579074	0.579074	0.625401	1.45007	0.452878	0.388131	0.799957	0.610172	0.947258

## Sheet: Fig4g
FDA- (%)
ct	11.9	37	17.5	18.9	19.8	22	31.1
dox 1µM	43.8	60	46.5	53.2	32.4	41	58.2
Ce3F4	12.3	25.1	18.3	21.4	22.1	25.5	30.9
Ce3F4 + dox	27.7	30.8	42.1	40.4	30	29.6	33.6
Dexra	10.9	15.1	16
Dexra + dox	22.2	31	25.3

## Sheet: Fig4h
Small (%)
ct	36.8	21.9	20	20.2	14.3	19.5	15.2	18.9
dox 1µM	62.9	39.5	57.3	40.6	47	45.7	45	44.9
Ce3F4	26.8	25.8	14.5	17.7	14.3	21.6	19.7	23.6
Ce3F4 + dox	31.3	34.8	37.9	39.4	38.7	34.9	41.2	38.1

## Sheet: Fig4j
FDA- (%)
ct	17	17.5	18.9	12.8	20	17.24
dox 1µM	29.2	46.5	53.2	35.8	48.9	42.72
Esi 05	15.3	22.3	18.9	12.5	27.1	19.22
Esi 05 + dox	30.6	52.2	53.7	35	42.5	42.8

## Sheet: Fig4k
Ctl	19.5	25.5	16.4	17	15
Dox	34.7	38.2	24.9	22.5	23
Ce3F4	22.5	28.1	15.6	17.1
Ce3F4 + Dox	21.4	27.8	18	14.7	17.6
