# Supplementary material for: EPAC1 inhibition protects the heart from doxorubicin-induced toxicity
Source: eLife journal article supplement (doi:10.7554/elife.83831), 2023-08-08
Supplement: fig5-data1 [file Data_Fig5.xlsx]

## Sheet: Fig5b
	Saline	Saline	Saline	Saline	Saline	DOXO	DOXO	DOXO	DOXO	DOXO	DOXO	DOXO
15WEEKS	63.5	87.2203	88.9236	65.7314	81.3225	72.1604	71.8179	59.3467	63.193	75.7053	72.4796	69.2868

## Sheet: Fig5c
	Saline	Saline	Saline	Saline	Saline	DOXO	DOXO	DOXO	DOXO	DOXO	DOXO	DOXO
15WEEKS	0.112422	0.130109	0.0648522	0.11991	0.0756757	0.12148	0.134273	0.141896	0.110379	0.161899	0.145387	0.160293

## Sheet: Fig5d
		Epac Normalized
2w	Ctl	1.19038
		1.08101
		1.40225
		1.71436
		1.05354
		0.952055
		0.753674
		0.794079
	Dox	1.52689
		0.964468
		1.09432
		0.461046
		2.04926
		1.76378
		1.04203
6w	Ctl	0.687844
		0.72093
		0.74011
		0.817044
		0.57227
		1.16439
		1.18965
		1.04002
		1.15035
	Dox	1.0466
		0.800742
		1.24017
		1.13464
		1.38734
		1.15893
		1.27043
		2.00912
15w	Ctl	1.30756
		1.10369
		1.93632
		0.8966
		2.37373
		0.81326
		1.28665
	Dox	0.616331
		0.669512
		0.808113
		1.5314
		0.819509
		0.8298
		0.874402
		0.188161

## Sheet: Fig5f
	Saline	Saline	Saline	Saline	Saline	Saline	DOXO	DOXO	DOXO	DOXO	DOXO
15WEEKS	52.8111	74.552	74.3678	72.4143	64.987	76.5276	55.8795	69.5399	74.1081	79.2019	72.4667

## Sheet: Fig5g
	Saline	Saline	Saline	Saline	Saline	Saline	DOXO	DOXO	DOXO	DOXO	DOXO
15WEEKS	0.145166	0.135008	0.0900809	0.117878	0.144174	0.140715	0.125078	0.113316	0.131018	0.156537	0.113635
