# Supplementary material for: EPAC1 inhibition protects the heart from doxorubicin-induced toxicity
Source: eLife journal article supplement (doi:10.7554/elife.83831), 2023-08-08
Supplement: fig6-data1 [file Data_Fig6.xlsx]

## Sheet: Fig6a
Contraction	Cell saline WT	Cell Dox WT	Cell saline KO	Cell Dox KO
	5.39631	6.35769	11.8217	1.0145
	6.83435	2.41807	14.0078	5.1343
	15.9993	6.77031	4.0514	8.9236
	18.2588	3.16053	3.829	4.9043
	7.98311	13.0475	12.6201	5.5968
	14.6433	2.2952	25.7017	19.3593
	12.8746	1.54694	3.028	4.9729
	14.8279	7.28325	13.0963	9.0909
	11.2641	1.76427	6.3235	31.9534
	2.35084	5.88178	9.6587	6.0292
	3.9835	3.395	4.0588	17.6791
	5.98117	1.53657		11.7433
	3.9021	3.73056		16.1064
	5.005	1.5843		6.3826
	6.1911	5.71714		7.4779
	2.9715	1.1742		10.2638
	4.21229	3.2915		9.4321
	4.2215	8.404		19.2658
	4.60972			5.746
	1.9392			6.8203
	9.4769			2.8903
	2.3601
	8.0865
	4.455

## Sheet: Fig6b
F/F0	Cell saline WT	Cell Dox WT	Cell saline KO	Cell Dox KO
	3.9399	2.68385	3.4436	5.24121
	3.80599	3.23168	2.93826	3.83203
	2.24191	3.57518	2.14973	2.88443
	4.50391	3.55751	3.85581	2.48012
	3.61969	2.85835	3.19789	4.30276
	4.45913	2.55914	2.74055	3.42036
	4.6088	3.64839	5.11447	2.4675
	5.18067	2.80484	2.10194	2.70613
	4.25574	2.93246	3.26593	3.84633
	3.38379	3.11016	2.7978	3.86351
	4.86969	4.01548	2.42825	2.28925
	4.45124	3.32928	3.79569	4.60656
	3.4754	3.1191	2.79224	2.67004
	3.15747	2.2519	2.82829	3.97437
	2.53713	4.25988	3.88917	3.98607
	2.40365	3.02477	3.97345	3.34076
	2.4274	3.46122	4.66071	2.93874
	4.43441	3.05626	2.69121	3.58437
	3.91401	2.21459	4.50398	5.27391
	4.60935	4.45887	2.13189	2.3463
	5.15184	3.052	4.59857	2.95288
	4.37311	2.1067	2.71648	3.94034
	4.39755	2.58008	2.80759	4.75026
	3.45659	2.04479	2.49963	2.66644
	2.45129	2.08553	3.91245	3.12888
	5.30118	2.11151	2.6235	2.39292
	4.0281	1.57952	3.21494	2.79699
	4.59215	3.34912	1.81074	6.60192
	4.29762	4.39721	3.15342	3.23688
	4.14609	2.45953	2.16252	3.01492
	3.7301	2.95091	3.31364	4.61057
	4.03795	3.33411	2.49581	3.44838
	4.71873	3.40879	2.89313	3.94023
	2.50144	2.8763	3.47306	2.77389
	3.65349	3.00008	2.50263	3.14668
	4.18936	2.08579	2.7796	2.7433
	3.45716	2.54024	3.89586	3.26379
		3.34744	2.10547	2.78126
		3.67873	2.13087	4.19703
		4.61715	2.76393	4.49349
		4.36145	1.84095	2.21905
		3.63506		3.35675
		3.62473		3.47714
		3.47367		2.83064
		2.18019		3.53186
		2.51478		2.81354
		2.21401		3.1918
		2.79652		2.09573
		4.06344		2.67205

## Sheet: Fig6c
SR load	Cell saline WT	Cell Dox WT	Cell saline KO	Cell Dox KO
	10.6141	6.26787	7.56681	13.524
	9.51221	5.13961	6.55599	9.07338
	9.15245	7.09681	10.3206	11.0129
	8.99694	6.97743	6.43744	9.73585
	11.7709	3.69292	10.8838	11.373
	8.97742	7.09679	8.41402	10.8989
	6.10724	12.2199	5.83983	10.523
	9.19498	7.34358	6.53993	5.7842
	5.08377	8.47034	7.64055	6.58263
	9.7465	7.18237	14.1427	10.3264
	9.58649	9.17479	16.7844	13.1051
	6.79913	6.89514	7.06177	8.30876
	8.36766	3.3139	10.9533	10.0496
		8.07338	9.97011	12.5426
		5.61402	9.2588	5.86143
		7.80563	6.89874	11.8288
		7.4158	10.038	9.56733
			3.53119	11.0143
			5.97038	8.33333
			3.24017	7.43456
			9.38816	9.28183
			7.27428	6.56114
			20.4003	7.41872
				12.5988
				14.697
				9.86021
				10.5253
				10.7417
				33.0126
				14.9796
				21.5715
				15.8316
				13.1851
				15.0386
				9.77119
				6.95431
				9.7754

## Sheet: Fig6d
Serca2a Normalized	WT	EPAC1 KO
Ctl	1.10622	4.12085
	1.14075	3.93458
	1.2289	5.47267
	0.801191	2.96318
	1.09352	2.2151
		2.72636
Dox	0.765995	5.31604
	0.636948	3.73171
	0.724527	3.79735
	0.595844	3.0779
	0.985479	5.75179
	0.645508
	0.738832
