# Supplementary figures and images for: EPAC1 inhibition protects the heart from doxorubicin-induced toxicity
Source: eLife journal article supplement (doi:10.7554/elife.83831), 2023-08-08

**Fig. 1f**

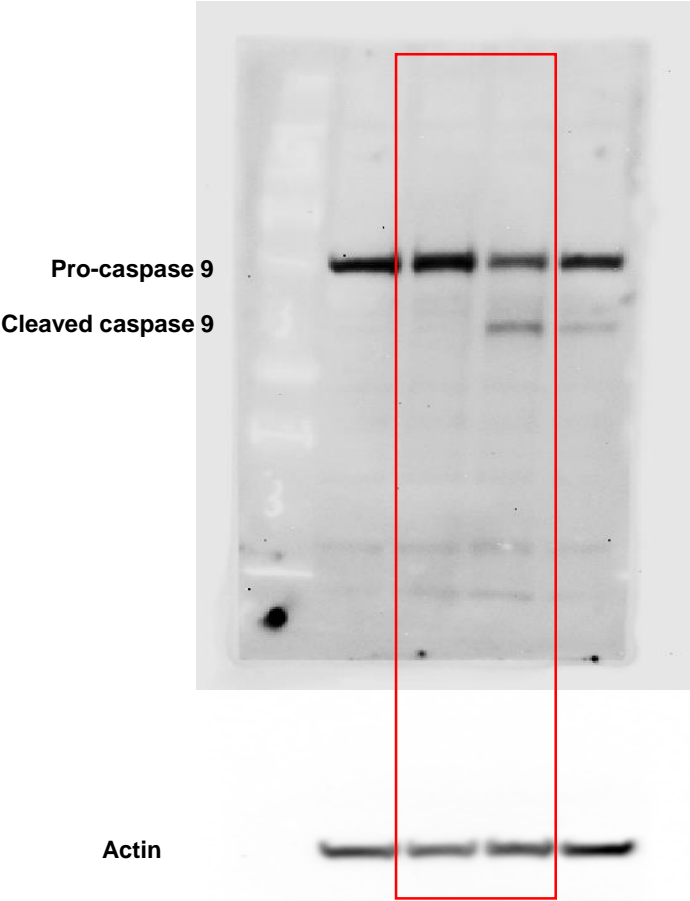

**Fig. 1g**

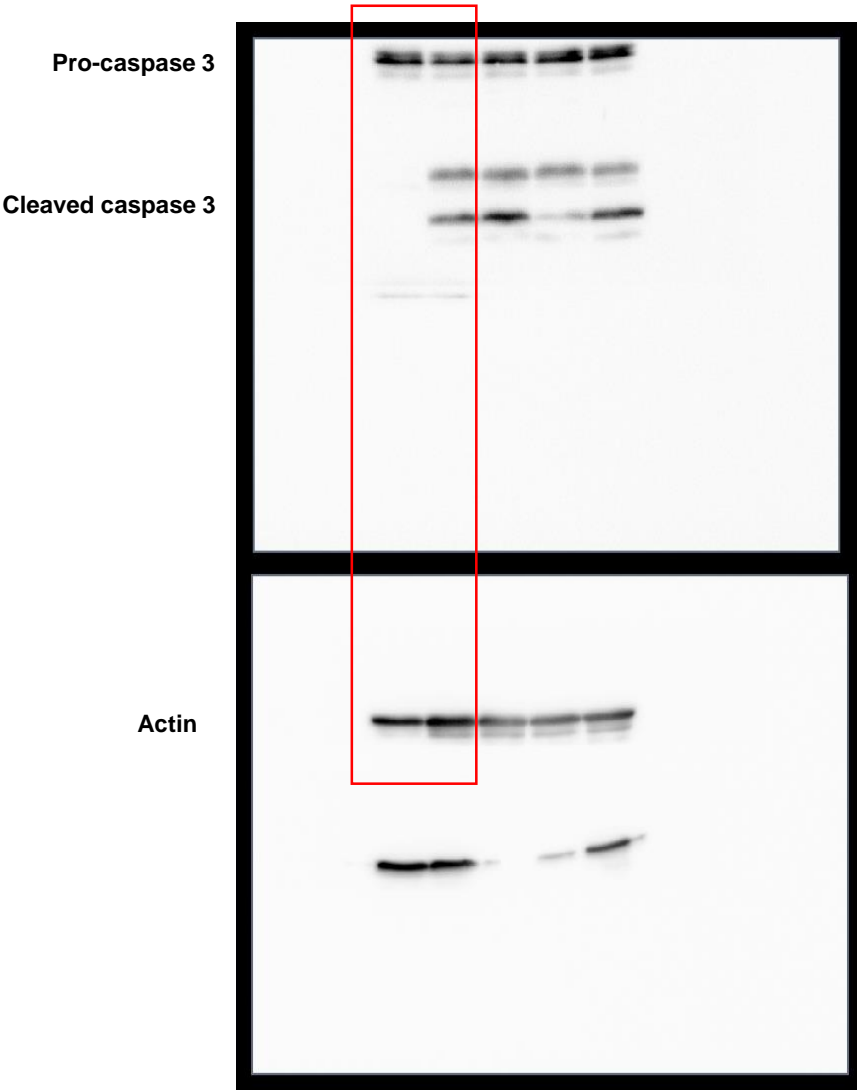

**Fig. 1j**

H<sub>2</sub>AX-pS139

Actin

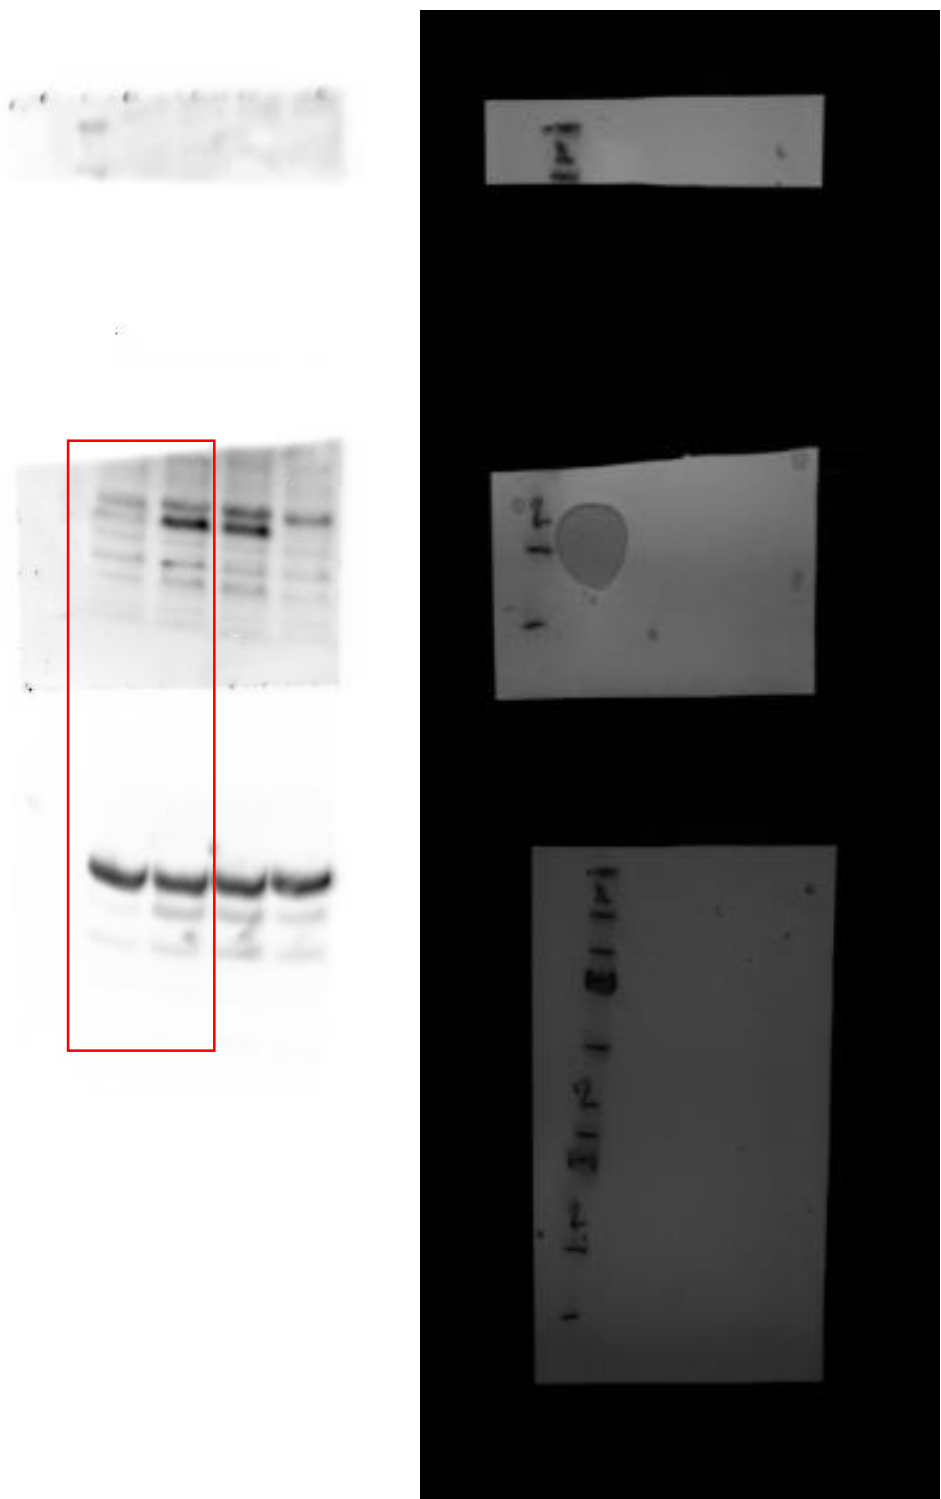

Supplement: fig1-data2 [file elife-83831-fig1-data2-v3.zip]

Fig. 2a

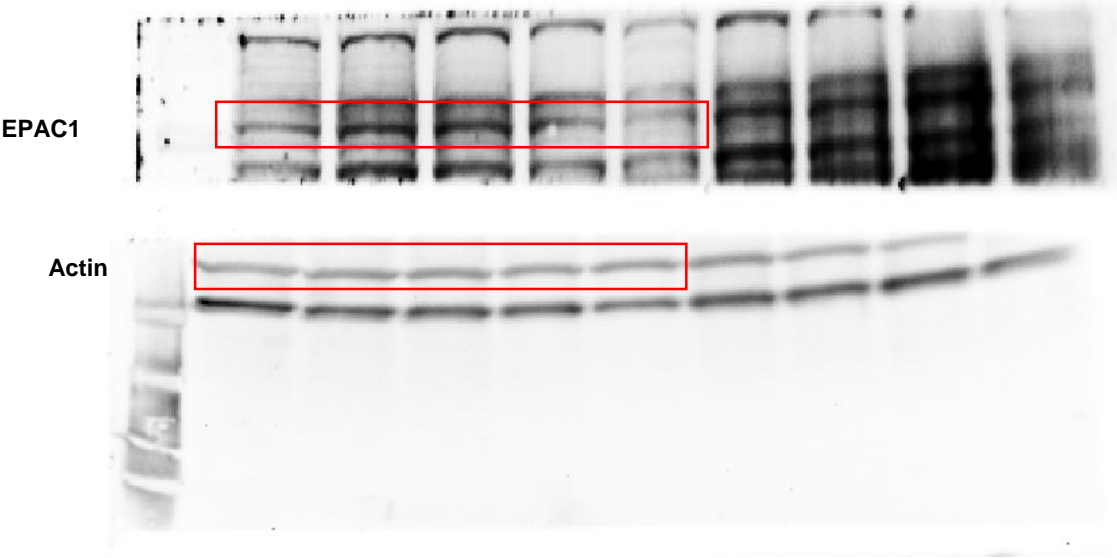

Fig. 2b

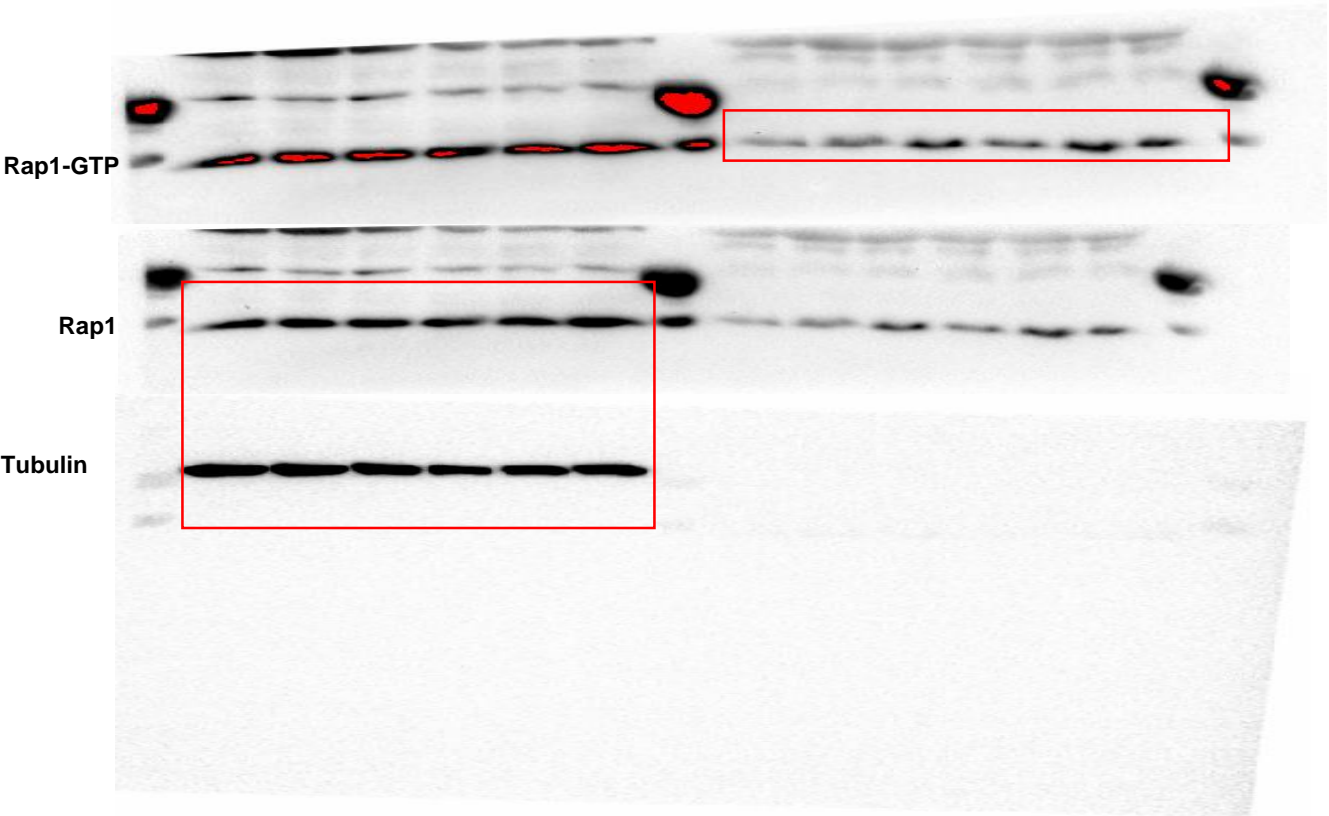

Supplement: fig2-data2 [file elife-83831-fig2-data2-v3.zip]

Fig. 3a

Actin

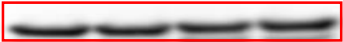

H<sub>2</sub>AX-pS139

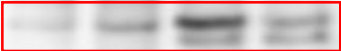

**Fig. 3b**

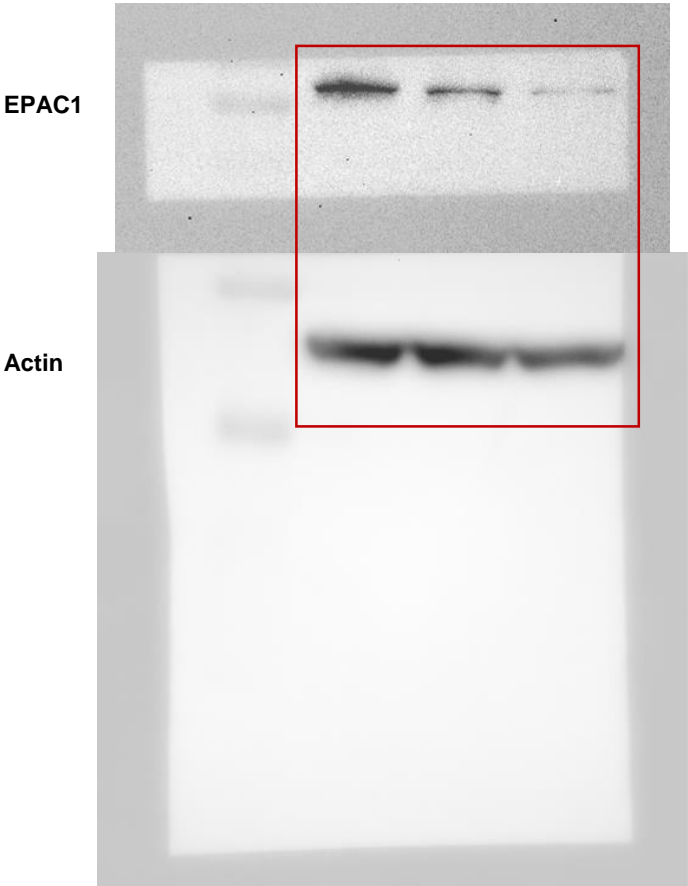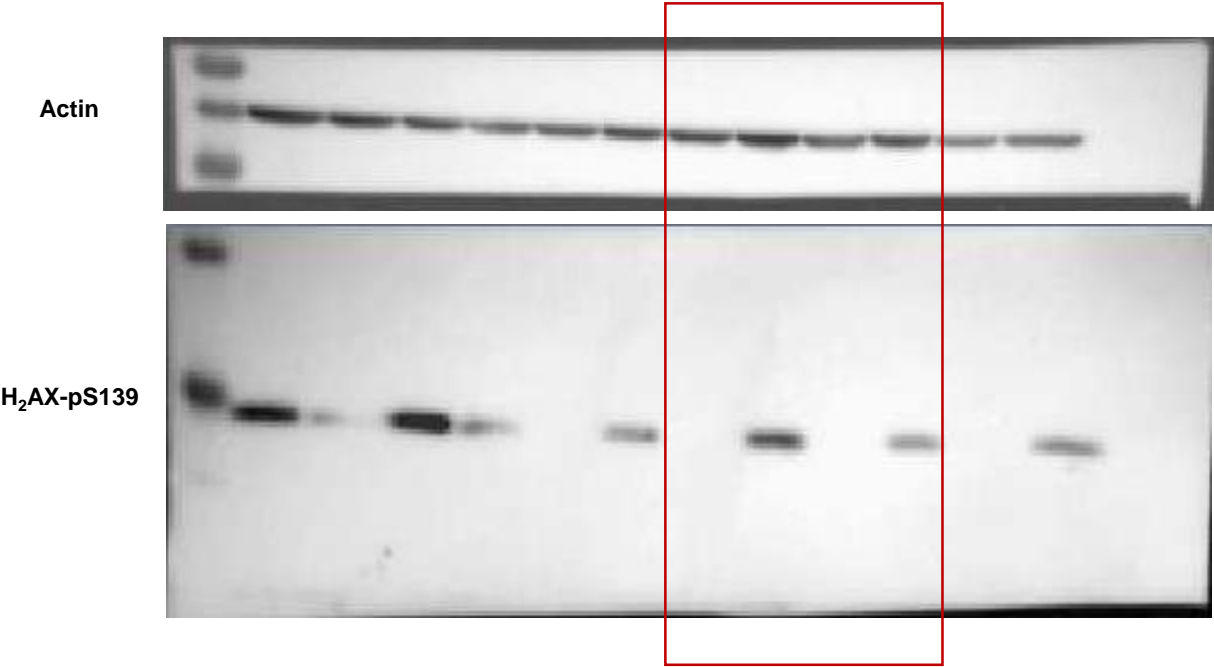

**Fig. 3c**

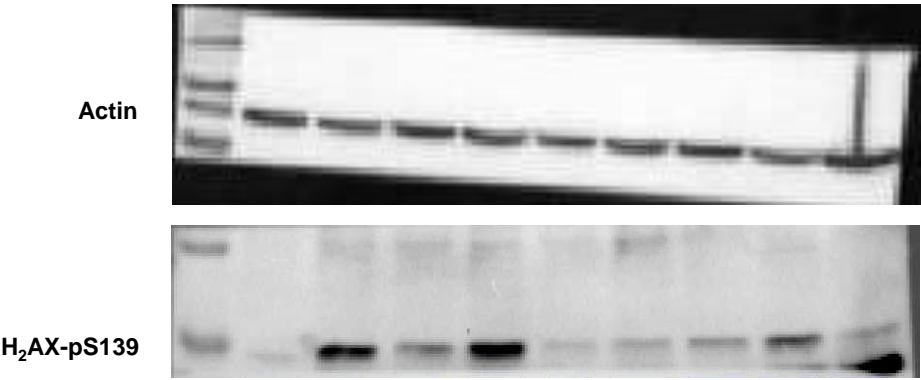

**Fig. 3d**

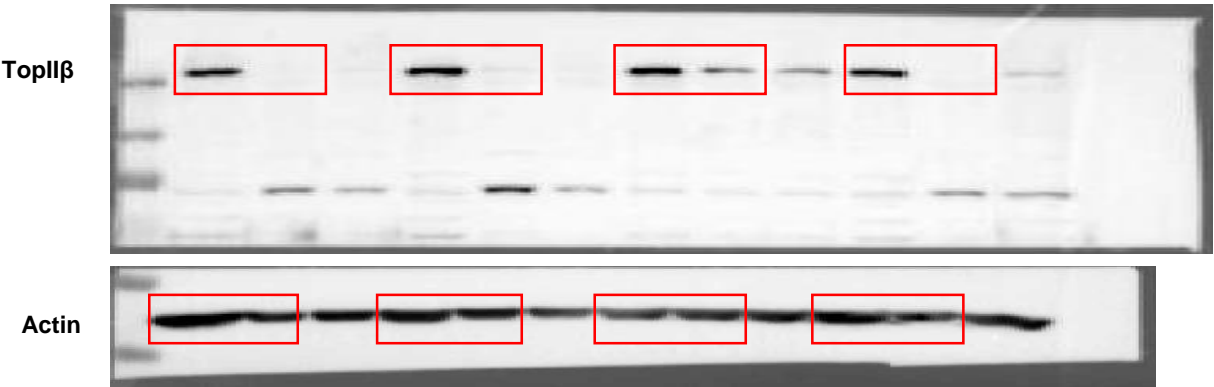

Supplement: fig3-data2 [file elife-83831-fig3-data2-v3.zip]

**Fig. 4e**

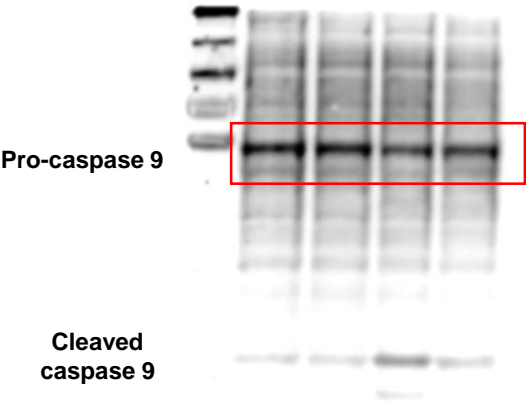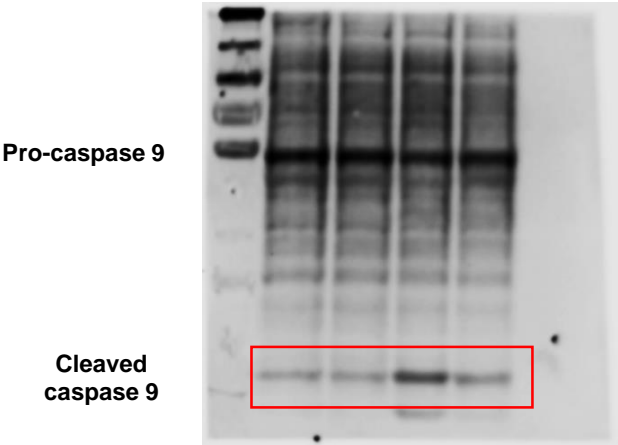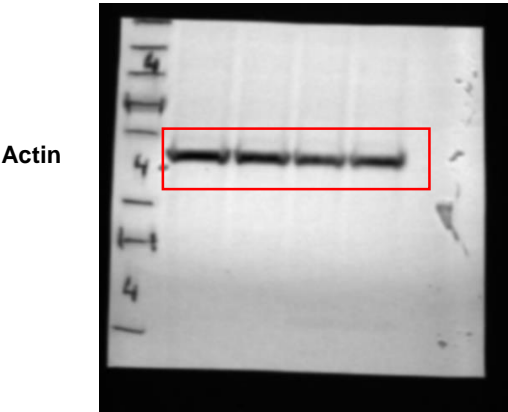

**Fig. 4f**

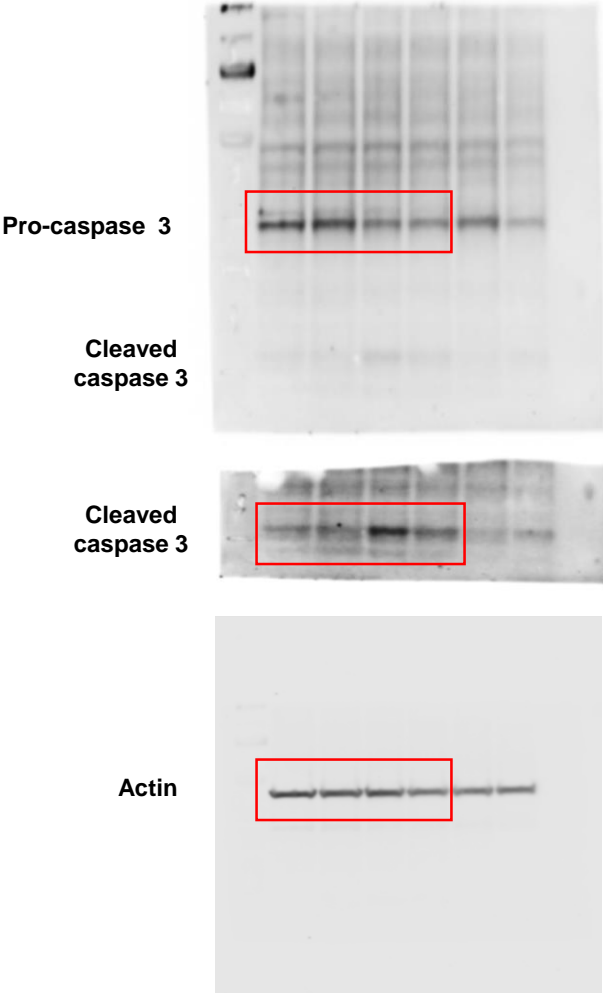

Supplement: fig4-data2 [file elife-83831-fig4-data2-v3.zip]

# Fig5d 2w

Raw data

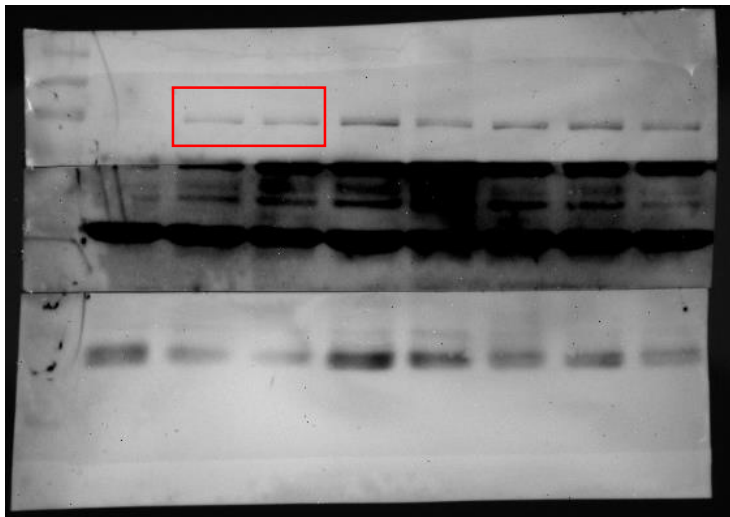

Epac1

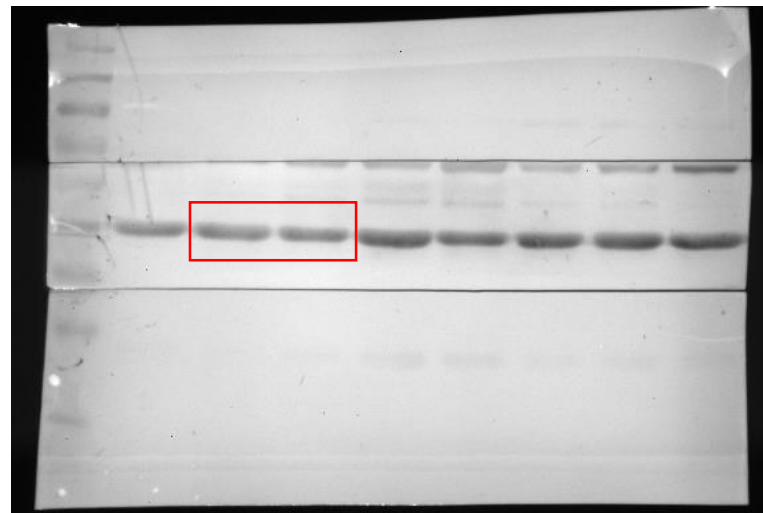

Actin

# Fig5d 6w

Raw data

Epac1

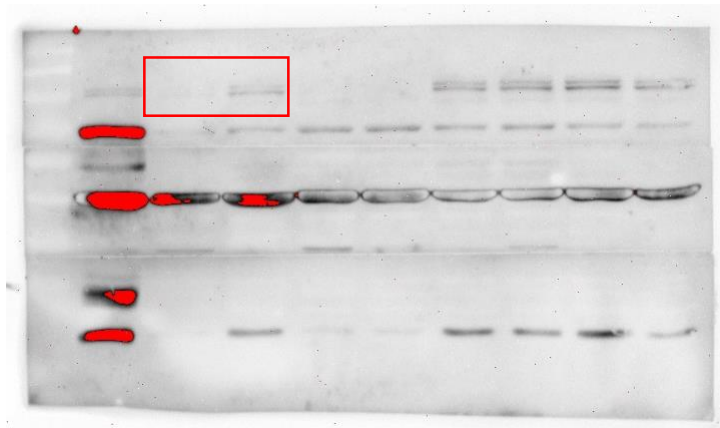

Actin

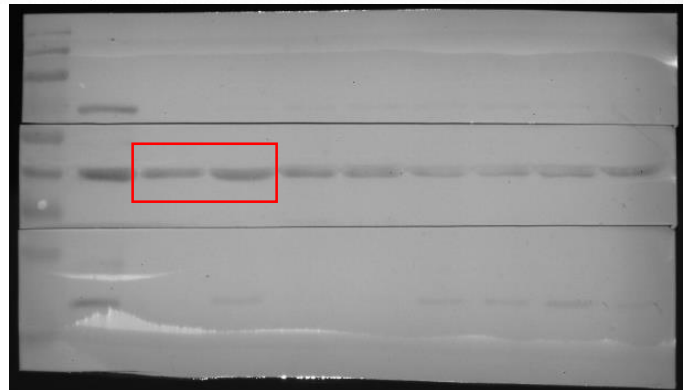

# Fig5d 15w

Raw data

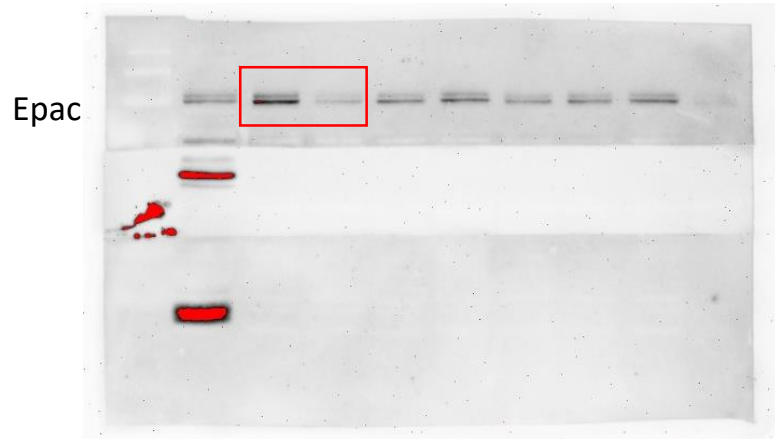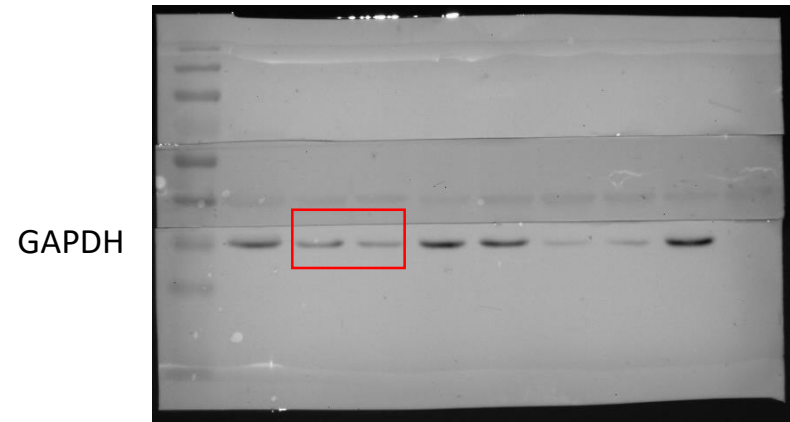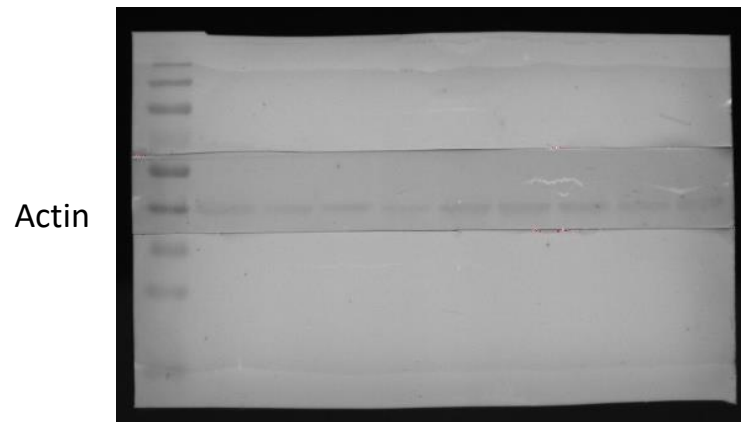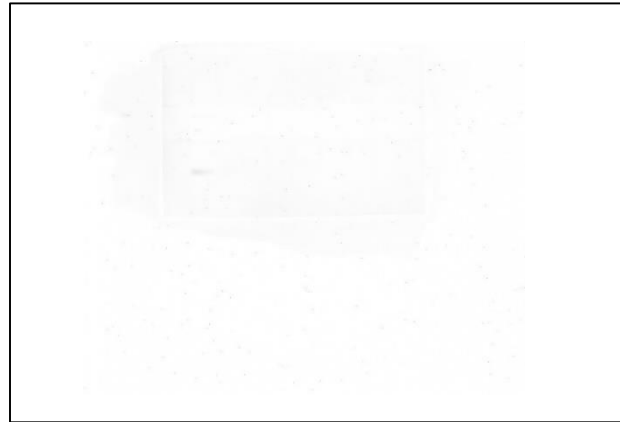

Supplement: fig5-data2 [file elife-83831-fig5-data2-v3.zip]

Fig. 5d

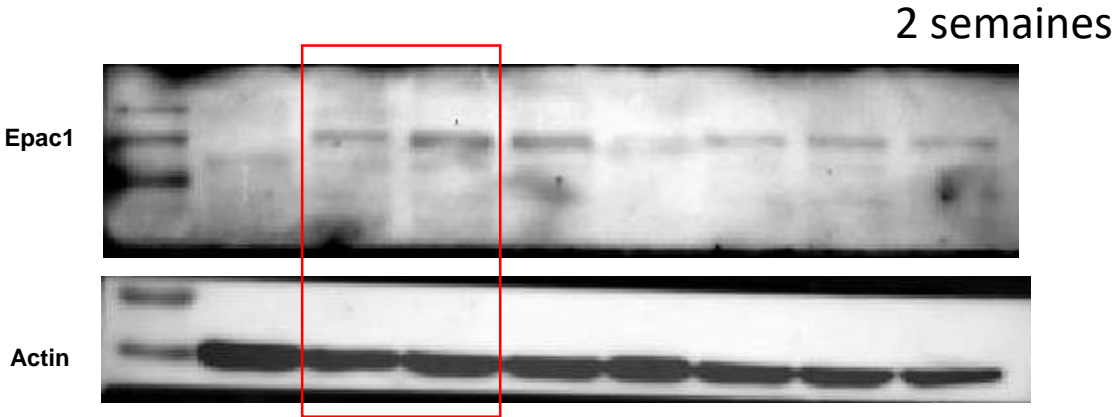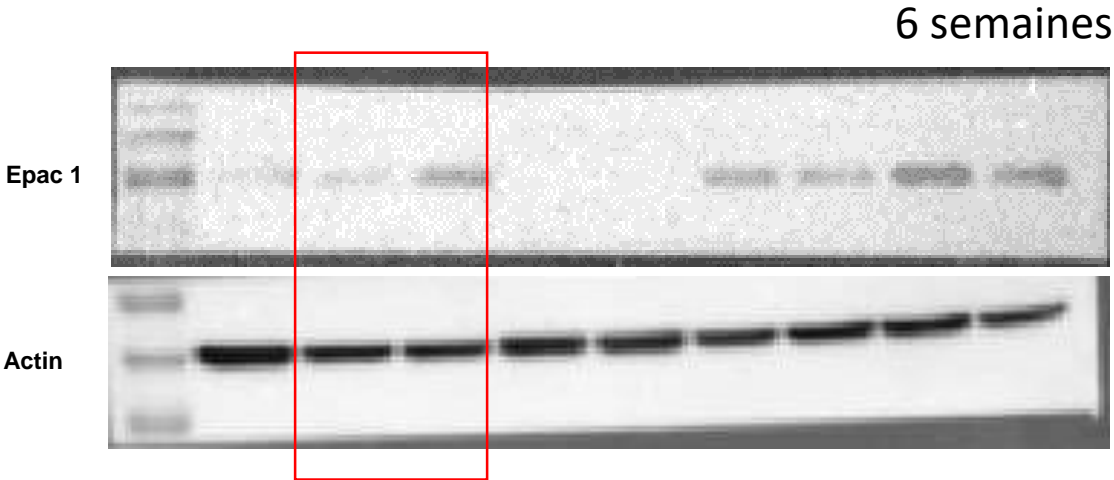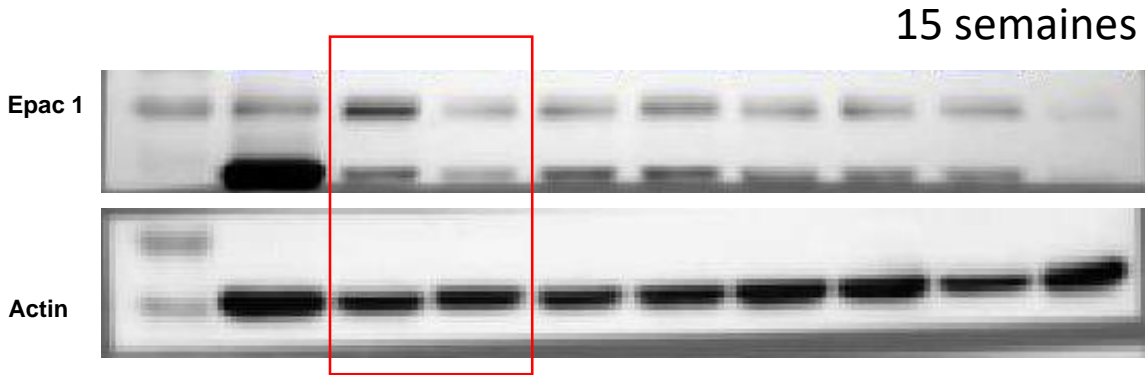

**Fig. 5e**

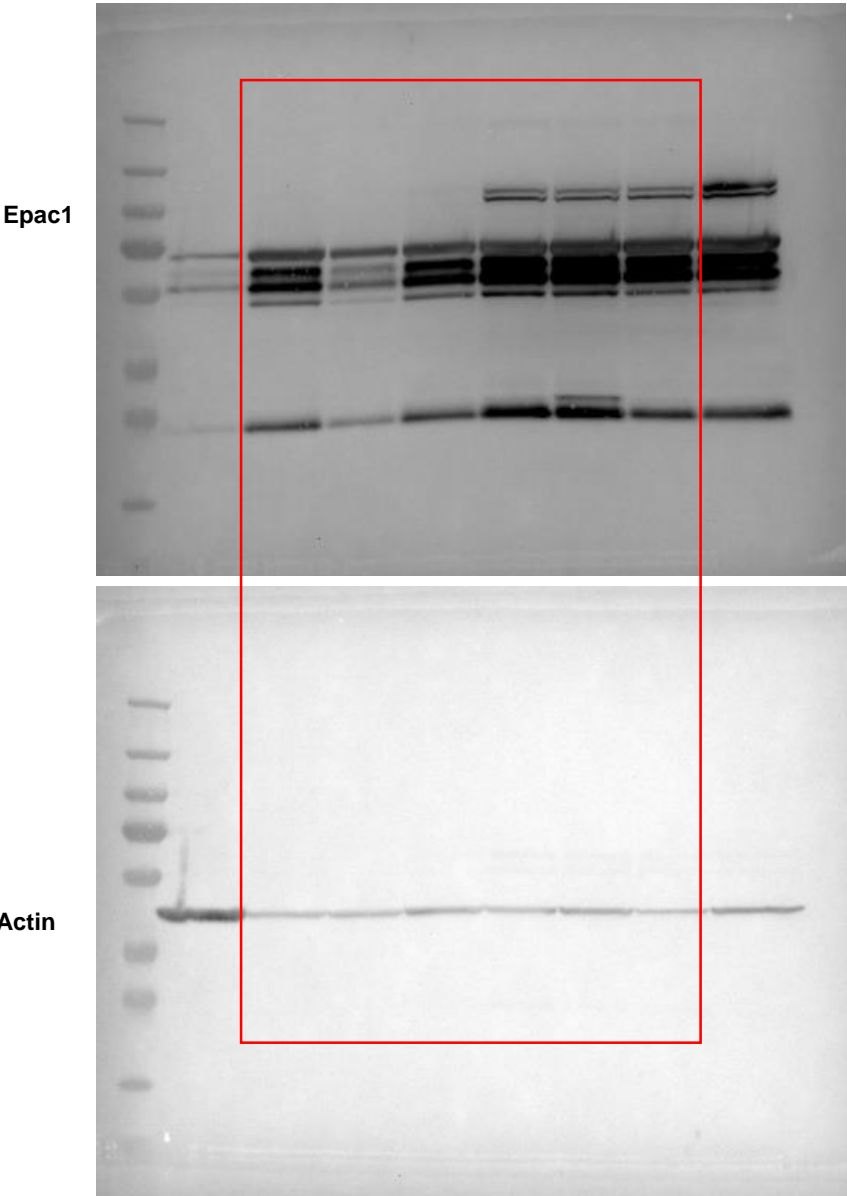

Supplement: fig5-data2 [file elife-83831-fig5-data2-v3.zip]

# Fig6d

Raw data

Serca2

Calsequestrin

WT

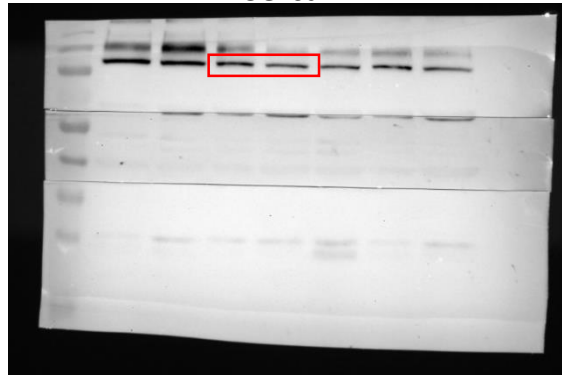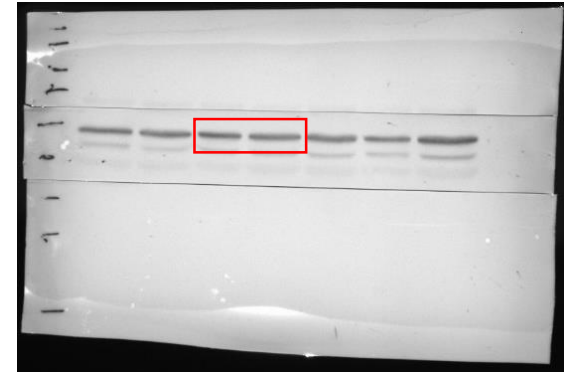

EPAC1 KO

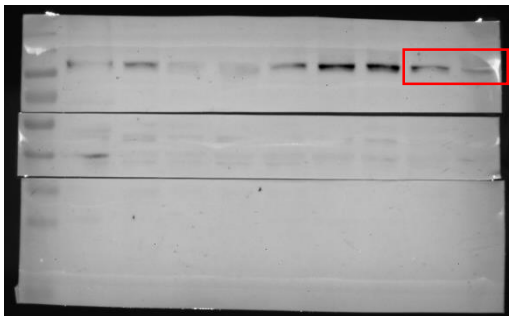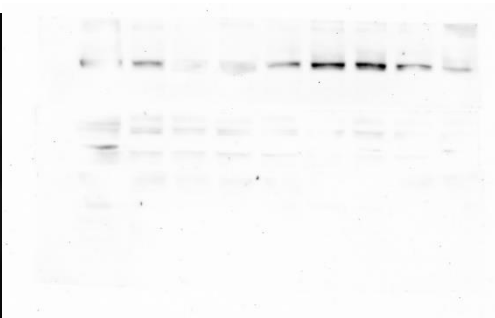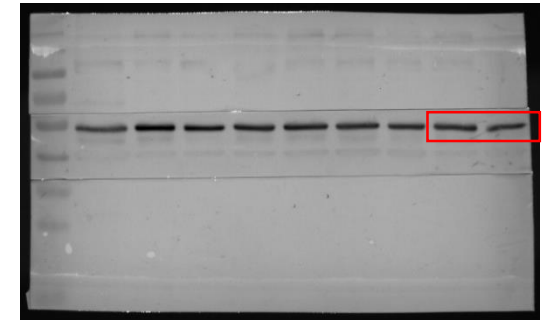

# Fig6d

Raw data\_LICOR (total protein) staining

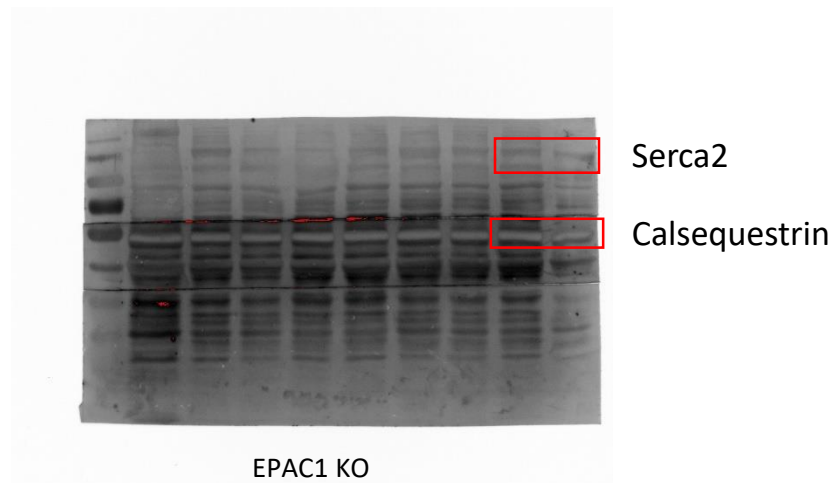

Supplement: fig6-data2 [file elife-83831-fig6-data2-v3.zip]

**Fig. 6d**

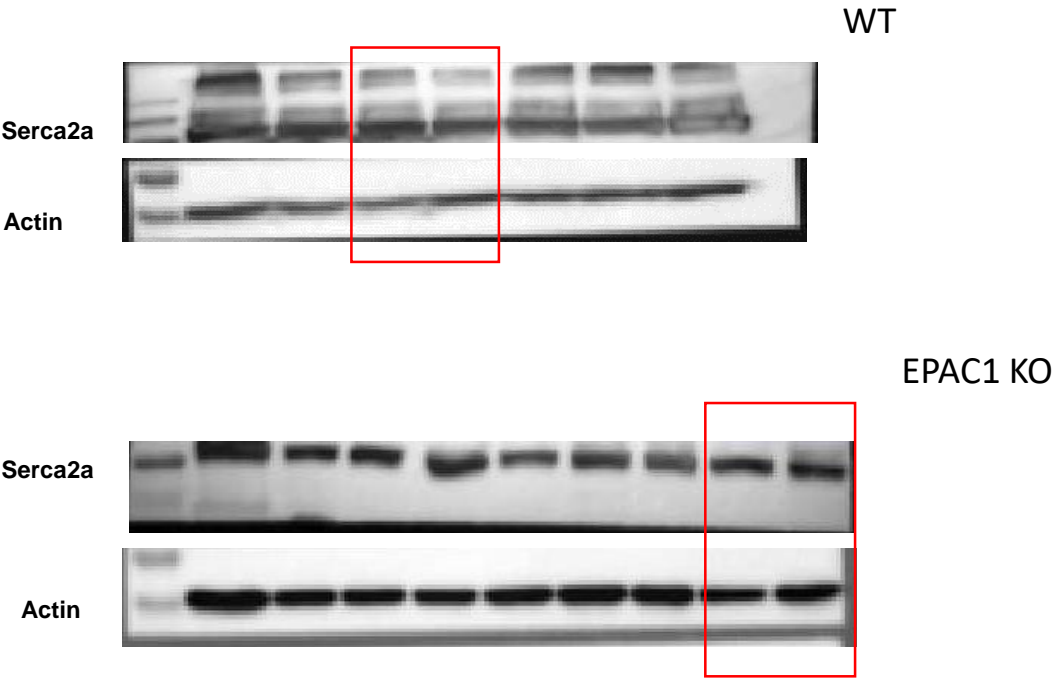

Supplement: fig6-data2 [file elife-83831-fig6-data2-v3.zip]
